# Supplementary material
Source: PubMed Central journal article supplement (PMC7335357)
Supplement: NIHMS1596673-supplement-1.pdf [file NIHMS1596673-supplement-1.pdf]

## SUPPLEMENTAL MATERIAL

*Intended for publication as a data supplement*

**Supplementary Table 1.** Search strategies for (A) MEDLINE, (B) EMBASE, (C) CENTRAL, and (D) CINAHL without language restriction from database inception to August 2019.

**(A) MEDLINE (1946-2019)**

| #  | Searches                                                                                                                                                                                                                                                   | Results   | Search type |
|----|------------------------------------------------------------------------------------------------------------------------------------------------------------------------------------------------------------------------------------------------------------|-----------|-------------|
| 1  | exp Syncope, Vasovagal/<br>(vasovagal adj2 (syncop* or faint* or collapse* or shock* or<br>reaction)).ti,ab.                                                                                                                                               | 1,869     | Advanced    |
| 2  | ((neurocardiogenic or neuro-cardiogenic or neurogenic or<br>neurally-mediated or neural* or cerebral or reflex) adj2<br>(syncop* or faint*)).ti,ab.                                                                                                        | 1,552     | Advanced    |
| 3  | or/1-3                                                                                                                                                                                                                                                     | 1,157     | Advanced    |
| 4  | exp Adrenergic Uptake Inhibitors/<br>((adrenergic or norepinephrine) adj2 (uptake or reuptake or<br>transport*) adj2 inhibit*).ti,ab.                                                                                                                      | 3,070     | Advanced    |
| 5  | exp Reboxetine/<br>exp Atomoxetine Hydrochloride/<br>sibutramine.ti,ab.                                                                                                                                                                                    | 68,893    | Advanced    |
| 6  | (reboxetine or atomoxetine or sibutramine).ti,ab.                                                                                                                                                                                                          | 2,286     | Advanced    |
| 7  | or/5-10                                                                                                                                                                                                                                                    | 592       | Advanced    |
| 8  | 4 and 11                                                                                                                                                                                                                                                   | 1,130     | Advanced    |
| 9  | remove duplicates from 12<br>((randomized controlled trial or controlled clinical trial).pt.<br>or randomized.ab. or randomised.ab. or placebo.ab. or drug<br>therapy.fs. or randomly.ab. or trial.ab. or groups.ab.) not (exp<br>animals/ not humans.sh.) | 1,060     | Advanced    |
| 10 | Case Reports/ or Letter/ or Historical Article/ or Review/<br>14 not 15                                                                                                                                                                                    | 3,066     | Advanced    |
| 11 | 13 and 16                                                                                                                                                                                                                                                  | 71,854    | Advanced    |
| 12 |                                                                                                                                                                                                                                                            | 10        | Advanced    |
| 13 |                                                                                                                                                                                                                                                            | 10        | Advanced    |
| 14 |                                                                                                                                                                                                                                                            | 3,546,227 |             |
| 15 |                                                                                                                                                                                                                                                            | 5,301,793 |             |
| 16 |                                                                                                                                                                                                                                                            | 2,691,504 | Advanced    |
| 17 |                                                                                                                                                                                                                                                            | 5         | Advanced    |

**(B) EMBASE (1974-2019)**

| #  | Searches                                                                                                                                                                                                                                                              | Results   | Search type |
|----|-----------------------------------------------------------------------------------------------------------------------------------------------------------------------------------------------------------------------------------------------------------------------|-----------|-------------|
| 1  | exp faintness/<br>(vasovagal adj2 (syncop* or faint* or collapse* or shock* or reaction)).ti,ab.                                                                                                                                                                      | 21,687    | Advanced    |
| 2  | ((neurocardiogenic or neuro-cardiogenic or neurogenic or neurally-mediated or neural* or cerebral or reflex) adj2 (syncop* or faint*)).ti,ab.                                                                                                                         | 2,766     | Advanced    |
| 3  | or/1-3                                                                                                                                                                                                                                                                | 1,838     | Advanced    |
| 4  | exp noradrenalin uptake inhibitor/<br>((adrenergic or norepinephrine or noradrenalin*) adj2 (uptake or reuptake or transport*) adj2 inhibit*).ti,ab.                                                                                                                  | 24,356    | Advanced    |
| 5  | exp reboxetine/                                                                                                                                                                                                                                                       | 205,581   | Advanced    |
| 6  | exp atomoxetine/                                                                                                                                                                                                                                                      | 3,718     | Advanced    |
| 7  | sibutramine.mp.                                                                                                                                                                                                                                                       | 3,314     | Advanced    |
| 8  | (reboxetine or atomoxetine or sibutramine).ti,ab.                                                                                                                                                                                                                     | 5,157     | Advanced    |
| 9  | or/5-10                                                                                                                                                                                                                                                               | 1,636     | Advanced    |
| 10 | 4 and 11                                                                                                                                                                                                                                                              | 5,013     | Advanced    |
| 11 | remove duplicates from 12                                                                                                                                                                                                                                             | 206,193   | Advanced    |
| 12 | crossover-procedure/ or double-blind procedure/ or randomized controlled trial/ or single-blind procedure/ or (random* or factorial* or crossover* or cross over* or placebo* or (doubl* adj blind*) or (singl* adj blind*) or assign* or allocat* or volunteer*).tw. | 512       | Advanced    |
| 13 | case report/ or letter/ or review/                                                                                                                                                                                                                                    | 2,205,370 | Advanced    |
| 14 | 14 not 15                                                                                                                                                                                                                                                             | 5,543,541 |             |
| 15 | 13 and 16                                                                                                                                                                                                                                                             | 2,024,683 |             |
| 16 |                                                                                                                                                                                                                                                                       | 66        | Advanced    |
| 17 |                                                                                                                                                                                                                                                                       |           |             |

**(C) CENTRAL (1995-2019)**

| #  | Searches                                                                                                                                          | Results | Search type |
|----|---------------------------------------------------------------------------------------------------------------------------------------------------|---------|-------------|
| 1  | MeSH descriptor: [Syncope, Vasovagal] explode all trees                                                                                           | 158     | Advanced    |
| 2  | (vasovagal near/2 (syncop* or faint* or collapse* or shock* or reaction)):ti,ab,kw                                                                | 344     | Advanced    |
| 3  | ((neurocardiogenic or neuro-cardiogenic or neurogenic or neurally-mediated or neural* or cerebral or reflex) near/2 (syncop* or faint*)):ti,ab,kw | 127     | Advanced    |
| 4  | #1 or #2 or #3                                                                                                                                    | 408     | Advanced    |
| 5  | MeSH descriptor: [Adrenergic Uptake Inhibitors] explode all trees                                                                                 | 460     | Advanced    |
| 6  | ((adrenergic or norepinephrine) adj2 (uptake or reuptake or transport*) adj2 inhibit*):ti,ab,kw                                                   | 1,013   | Advanced    |
| 7  | MeSH descriptor: [Reboxetine] explode all trees                                                                                                   | 143     | Advanced    |
| 8  | MeSH descriptor: [Atomoxetine Hydrochloride] explode all trees                                                                                    | 317     | Advanced    |
| 9  | (sibutramine):ti,ab,kw                                                                                                                            | 357     | Advanced    |
| 10 | (reboxetine or atomoxetine or sibutramine):ti,ab,kw                                                                                               | 1,305   | Advanced    |
| 11 | #5 or #6 or #7 or #8 or #9 or #10                                                                                                                 | 1,993   | Advanced    |
| 12 | #4 or #11                                                                                                                                         | 7       | Advanced    |

**(D) CINAHL (1937-2019)**

| #   | Searches                                                                                                                                                                                                                                                                                                                                                                                                                                                                                                                                                                                                                                                                                                                                                                                                                                                                                                                                                                         | Results   | Search type |
|-----|----------------------------------------------------------------------------------------------------------------------------------------------------------------------------------------------------------------------------------------------------------------------------------------------------------------------------------------------------------------------------------------------------------------------------------------------------------------------------------------------------------------------------------------------------------------------------------------------------------------------------------------------------------------------------------------------------------------------------------------------------------------------------------------------------------------------------------------------------------------------------------------------------------------------------------------------------------------------------------|-----------|-------------|
| S1  | (MH "Syncope, Vasovagal")                                                                                                                                                                                                                                                                                                                                                                                                                                                                                                                                                                                                                                                                                                                                                                                                                                                                                                                                                        | 742       | Advanced    |
| S2  | (vasovagal W2 (syncop* or faint* or collapse* or shock* or reaction))                                                                                                                                                                                                                                                                                                                                                                                                                                                                                                                                                                                                                                                                                                                                                                                                                                                                                                            | 580       | Advanced    |
| S3  | ((neurocardiogenic or neuro-cardiogenic or neurogenic or neurally-mediated or neural* or cerebral or reflex) W2 (syncop* or faint*))                                                                                                                                                                                                                                                                                                                                                                                                                                                                                                                                                                                                                                                                                                                                                                                                                                             | 770       | Advanced    |
| S4  | S1 or S2 or S3                                                                                                                                                                                                                                                                                                                                                                                                                                                                                                                                                                                                                                                                                                                                                                                                                                                                                                                                                                   | 1,487     | Advanced    |
| S5  | (MH "Adrenergic Uptake Inhibitors+")                                                                                                                                                                                                                                                                                                                                                                                                                                                                                                                                                                                                                                                                                                                                                                                                                                                                                                                                             | 8,092     | Advanced    |
| S6  | (adrenergic or norepinephrine) W2 (uptake or reuptake or transport*) W2 inhibit*                                                                                                                                                                                                                                                                                                                                                                                                                                                                                                                                                                                                                                                                                                                                                                                                                                                                                                 | 1,042     | Advanced    |
| S7  | reboxetine                                                                                                                                                                                                                                                                                                                                                                                                                                                                                                                                                                                                                                                                                                                                                                                                                                                                                                                                                                       | 91        | Advanced    |
| S8  | (MH "Atomoxetine")                                                                                                                                                                                                                                                                                                                                                                                                                                                                                                                                                                                                                                                                                                                                                                                                                                                                                                                                                               | 264       | Advanced    |
| S9  | (MH "Sibutramine")                                                                                                                                                                                                                                                                                                                                                                                                                                                                                                                                                                                                                                                                                                                                                                                                                                                                                                                                                               | 239       | Advanced    |
| S10 | reboxetine or atomoxetine or sibutramine                                                                                                                                                                                                                                                                                                                                                                                                                                                                                                                                                                                                                                                                                                                                                                                                                                                                                                                                         | 1,192     | Advanced    |
| S11 | S5 or S6 or S7 or S8 or S9 or S10<br>((MH "Random Assignment") or (MH "Random Sample+") or (MH "Crossover Design") or (MH "Clinical Trials+") or (MH "Comparative Studies") or (MH "Control (Research)+") or (MH "Control Group") or (MH "Factorial Design") or (MH "Quasi-Experimental Studies+") or (MH "Placebos") or (MH "Meta Analysis") or (MH "Sample Size") or (MH "Research, Nursing") or (MH "Research Question") or (MH "Research Methodology+") or (MH "Evaluation Research+") or (MH "Concurrent Prospective Studies") or (MH "Prospective Studies") or (MH "Nursing Practice, Research-Based") or (MH "Solomon Four-Group Design") or (MH "One-Shot Case Study") or (MH "Pretest-Posttest Design+") or (MH "Static Group Comparison") or (MH "Study Design") or (MH "Clinical Research+")) or (clinical nursing research or random* or cross?over or placebo* or control* or factorial or sham* or meta?analy* or systematic review* or blind* or mask* or trial*) | 9,259     | Advanced    |
| S12 | or blind* or mask* or trial*)                                                                                                                                                                                                                                                                                                                                                                                                                                                                                                                                                                                                                                                                                                                                                                                                                                                                                                                                                    | 2,587,090 | Advanced    |
| S13 | S4 and S11 and S12                                                                                                                                                                                                                                                                                                                                                                                                                                                                                                                                                                                                                                                                                                                                                                                                                                                                                                                                                               | 6         | Advanced    |

**Supplementary Table 2.** Individual characteristics and risk of bias assessments of included studies.

| <b>Birkenfeld, 2002</b>                                                                                                                                                                                                                                                 |                                                                                                                                                                                                                                                  |                                                                                                 |
|-------------------------------------------------------------------------------------------------------------------------------------------------------------------------------------------------------------------------------------------------------------------------|--------------------------------------------------------------------------------------------------------------------------------------------------------------------------------------------------------------------------------------------------|-------------------------------------------------------------------------------------------------|
| Study Design                                                                                                                                                                                                                                                            | Double-blind crossover randomized controlled trial                                                                                                                                                                                               |                                                                                                 |
| Participants                                                                                                                                                                                                                                                            | 11 healthy volunteers randomized: 7 males, 4 females; mean age of 27 ± 2<br><i>Inclusion criteria:</i> healthy volunteers without diagnosis of vasovagal syncope<br><i>Exclusion criteria:</i> diagnosis of vasovagal syncope                    |                                                                                                 |
| Interventions                                                                                                                                                                                                                                                           | Sibutramine: 10 mg PO x2 plus 20 mg PO, 12 hours apart (26 h, 14 h, and 2 h before testing)<br><i>versus</i><br>Placebo: matched                                                                                                                 |                                                                                                 |
| Outcome                                                                                                                                                                                                                                                                 | HUT-induced presyncope (with decrease in blood pressure and heart rate of at least 30 mmHg and 20 bpm, respectively) or intolerable pre-syncope symptoms to warrant premature abortion of HUT testing (dizziness, nausea, visual disturbances) * |                                                                                                 |
| <b>Risk of Bias</b>                                                                                                                                                                                                                                                     |                                                                                                                                                                                                                                                  |                                                                                                 |
| <i>Bias Domain</i>                                                                                                                                                                                                                                                      | <i>Judgement</i>                                                                                                                                                                                                                                 | <i>Support for Judgement</i>                                                                    |
| Random Sequence Generation (Selection Bias)                                                                                                                                                                                                                             | Unclear                                                                                                                                                                                                                                          | Randomization method not specified.                                                             |
| Allocation Concealment (Selection Bias)                                                                                                                                                                                                                                 | Unclear                                                                                                                                                                                                                                          | Randomization method not specified.                                                             |
| Blinding of Participants and Personnel (Performance Bias)                                                                                                                                                                                                               | Low                                                                                                                                                                                                                                              | Participants and investigators were blinded to treatment allocation until the end of the study. |
| Blinding of Outcome Assessment (Detection Bias)                                                                                                                                                                                                                         | Low                                                                                                                                                                                                                                              | Outcomes were clearly defined; blinding was maintained during outcome assessments.              |
| Incomplete Outcome Data (Attrition Bias)                                                                                                                                                                                                                                | Low                                                                                                                                                                                                                                              | No loss to follow-up.                                                                           |
| Selective Reporting (Reporting Bias)                                                                                                                                                                                                                                    | Low                                                                                                                                                                                                                                              | All pre-specified outcomes were reported.                                                       |
| Other Bias                                                                                                                                                                                                                                                              | Low                                                                                                                                                                                                                                              | Not applicable.                                                                                 |
| * Blood pressure and heart rate decreases, as well as the scope of pre-syncope symptoms warranting premature HUT abortion, were specifically defined in <i>Schroeder 2006</i> , which combines data from three separate study cohorts, including <i>Birkenfeld 2002</i> |                                                                                                                                                                                                                                                  |                                                                                                 |

|                                                                                                                                                                                                                                                                        |                                                                                                                                                                                                                          |                                                                                  |
|------------------------------------------------------------------------------------------------------------------------------------------------------------------------------------------------------------------------------------------------------------------------|--------------------------------------------------------------------------------------------------------------------------------------------------------------------------------------------------------------------------|----------------------------------------------------------------------------------|
| <b>Schroeder, 2002</b>                                                                                                                                                                                                                                                 |                                                                                                                                                                                                                          |                                                                                  |
| Study Design                                                                                                                                                                                                                                                           | Double-blind crossover randomized controlled trial                                                                                                                                                                       |                                                                                  |
| Participants                                                                                                                                                                                                                                                           | 18 patients randomized: 8 males, 10 females; mean age of $30 \pm 2$<br><i>Inclusion criteria:</i> healthy volunteers without diagnosis of vasovagal syncope<br><i>Exclusion criteria:</i> diagnosis of vasovagal syncope |                                                                                  |
| Interventions                                                                                                                                                                                                                                                          | Reboxetine: 8 mg PO x2, 11 hours apart (12 h and 1 h before testing)<br><i>versus</i><br>Placebo: matched                                                                                                                |                                                                                  |
| Outcome                                                                                                                                                                                                                                                                | HUT-induced presyncope (with decrease in blood pressure and heart rate of at least 30 mmHg and 20 bpm, respectively) *                                                                                                   |                                                                                  |
| <b>Risk of Bias</b>                                                                                                                                                                                                                                                    |                                                                                                                                                                                                                          |                                                                                  |
| <i>Bias Domain</i>                                                                                                                                                                                                                                                     | <i>Judgement</i>                                                                                                                                                                                                         | <i>Support for Judgement</i>                                                     |
| Random Sequence Generation (Selection Bias)                                                                                                                                                                                                                            | Unclear                                                                                                                                                                                                                  | Randomization method not specified.                                              |
| Allocation Concealment (Selection Bias)                                                                                                                                                                                                                                | Unclear                                                                                                                                                                                                                  | Randomization method not specified.                                              |
| Blinding of Participants and Personnel (Performance Bias)                                                                                                                                                                                                              | Low                                                                                                                                                                                                                      | Participants and investigators were aware of treatment allocation.               |
| Blinding of Outcome Assessment (Detection Bias)                                                                                                                                                                                                                        | Low                                                                                                                                                                                                                      | Outcome was clearly defined; blinding was maintained during outcome assessments. |
| Incomplete Outcome Data (Attrition Bias)                                                                                                                                                                                                                               | Low                                                                                                                                                                                                                      | No loss to follow-up.                                                            |
| Selective Reporting (Reporting Bias)                                                                                                                                                                                                                                   | Low                                                                                                                                                                                                                      | All pre-specified outcomes were reported.                                        |
| Other Bias                                                                                                                                                                                                                                                             | Low                                                                                                                                                                                                                      | Not applicable.                                                                  |
| * Blood pressure and heart rate decreases, as well as the scope of pre-syncope symptoms warranting premature HUT abortion, were specifically defined in <i>Schroeder 2006</i> , which combines data from three separate study cohorts, including <i>Schroeder 2002</i> |                                                                                                                                                                                                                          |                                                                                  |

| <b>Schroeder, 2006</b>                                    |                                                                                                                                                                                                                         |                                                                                                 |
|-----------------------------------------------------------|-------------------------------------------------------------------------------------------------------------------------------------------------------------------------------------------------------------------------|-------------------------------------------------------------------------------------------------|
| Study Design                                              | Double-blind crossover randomized controlled trial                                                                                                                                                                      |                                                                                                 |
| Participants                                              | 16 patients randomized: 16 males, 0 females; mean age of 26 ± 1<br><i>Inclusion criteria: healthy volunteers without diagnosis of vasovagal syncope</i><br><i>Exclusion criteria: diagnosis of vasovagal syncope</i>    |                                                                                                 |
| Interventions                                             | Reboxetine: 8 mg PO x1 (1.5 h before testing)<br><i>versus</i><br>Placebo: matched                                                                                                                                      |                                                                                                 |
| Outcome                                                   | HUT-induced presyncope (with decrease in blood pressure and heart rate of at least 30 mmHg and 20 bpm, respectively) or HUT-induced vasodepressor-type presyncope (with decrease in blood pressure of at least 20 mmHg) |                                                                                                 |
| <b>Risk of Bias</b>                                       |                                                                                                                                                                                                                         |                                                                                                 |
| <i>Bias Domain</i>                                        | <i>Judgement</i>                                                                                                                                                                                                        | <i>Support for Judgement</i>                                                                    |
| Random Sequence Generation (Selection Bias)               | Unclear                                                                                                                                                                                                                 | Randomization method not specified.                                                             |
| Allocation Concealment (Selection Bias)                   | Unclear                                                                                                                                                                                                                 | Randomization method not specified.                                                             |
| Blinding of Participants and Personnel (Performance Bias) | Low                                                                                                                                                                                                                     | Participants and investigators were blinded to treatment allocation until the end of the study. |
| Blinding of Outcome Assessment (Detection Bias)           | Low                                                                                                                                                                                                                     | Outcomes were clearly defined; blinding was maintained during outcome assessments.              |
| Incomplete Outcome Data (Attrition Bias)                  | Low                                                                                                                                                                                                                     | No loss to follow-up.                                                                           |
| Selective Reporting (Reporting Bias)                      | Low                                                                                                                                                                                                                     | All pre-specified outcomes were reported.                                                       |
| Other Bias                                                | Low                                                                                                                                                                                                                     | Not applicable.                                                                                 |

| <b>Sheldon, 2019</b>                                      |                                                                                                                                                                                                                                                           |                                                                                                 |
|-----------------------------------------------------------|-----------------------------------------------------------------------------------------------------------------------------------------------------------------------------------------------------------------------------------------------------------|-------------------------------------------------------------------------------------------------|
| Study Design                                              | Double-blind randomized controlled trial                                                                                                                                                                                                                  |                                                                                                 |
| Participants                                              | 56 patients randomized: 15 males, 41 females; mean age of 35 ± 14<br><i>Inclusion criteria:</i> ≥1 syncopal recurrence in the year preceding enrolment; ≥-2 points on the Syncope Symptom Score<br><i>Exclusion criteria:</i> syncope due to other causes |                                                                                                 |
| Interventions                                             | Atomoxetine: 40 mg PO x2, 12 hours apart (1 h before testing)<br><i>versus</i><br>Placebo: matched                                                                                                                                                        |                                                                                                 |
| Outcome                                                   | Syncope induced by head-up-tilt testing                                                                                                                                                                                                                   |                                                                                                 |
| <b>Risk of Bias</b>                                       |                                                                                                                                                                                                                                                           |                                                                                                 |
| <i>Bias Domain</i>                                        | <i>Judgement</i>                                                                                                                                                                                                                                          | <i>Support for Judgement</i>                                                                    |
| Random Sequence Generation (Selection Bias)               | Low                                                                                                                                                                                                                                                       | Eligible patients were randomly assigned using a computer-generated random number sequence.     |
| Allocation Concealment (Selection Bias)                   | Low                                                                                                                                                                                                                                                       | Eligible patients were randomly assigned using a computer-generated random number sequence.     |
| Blinding of Participants and Personnel (Performance Bias) | Low                                                                                                                                                                                                                                                       | Participants and investigators were blinded to treatment allocation until the end of the study. |
| Blinding of Outcome Assessment (Detection Bias)           | Low                                                                                                                                                                                                                                                       | Outcome was clearly defined; blinding was maintained during outcome assessments.                |
| Incomplete Outcome Data (Attrition Bias)                  | Low                                                                                                                                                                                                                                                       | No loss to follow-up.                                                                           |
| Selective Reporting (Reporting Bias)                      | Low                                                                                                                                                                                                                                                       | All pre-specified outcomes were reported.                                                       |
| Other Bias                                                | Low                                                                                                                                                                                                                                                       | Not applicable.                                                                                 |
